# Supplementary material for: Encapsulation of MoSe2 in carbon fibers as anodes for potassium ion batteries and nonaqueous battery–supercapacitor hybrid devices
Source: Royal Society of Chemistry journal article supplement (doi:10.1039/c9nr03480c), 2019-01-01
Supplement: c9nr03480c1.pdf [file c9nr03480c1.pdf]

*Supporting information*

**Encapsulation of MoSe<sub>2</sub> in carbon fibers as anodes for potassium ion  
batteries and nonaqueous battery-supercapacitor hybrid devices**

Qing Shen,<sup>a‡</sup> Pengjie Jiang,<sup>a‡</sup> Hongcheng He,<sup>a</sup> Changmiao Chen,<sup>a</sup> Yang  
Liu<sup>a</sup> and Ming Zhang<sup>\*a</sup>

- a. Key Laboratory for Micro/Nano Optoelectronic Devices of Ministry of Education, Hunan Provincial Key Laboratory of Low-Dimensional, Structural Physics & Devices, School of Physics and Electronics, Hunan University, Changsha 410082, China.

\*Address correspondence to [zhangming@hnu.edu.cn](mailto:zhangming@hnu.edu.cn)

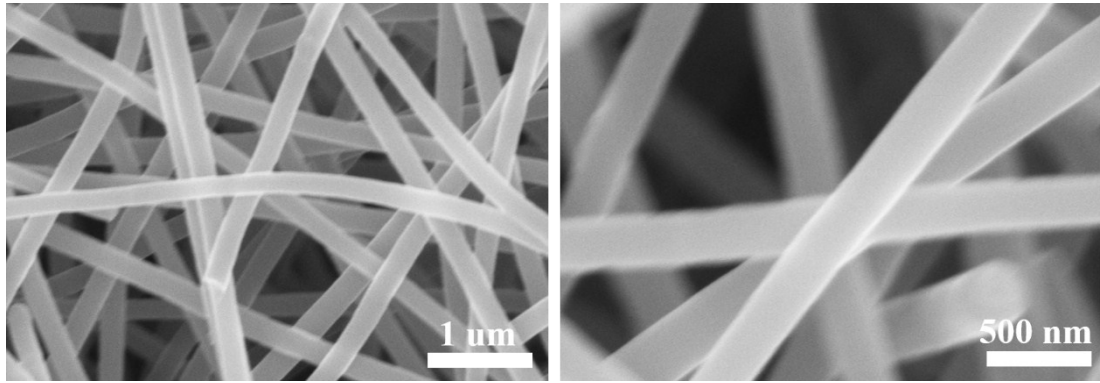

Figure S1: The SEM images of Pure Carbon nanofibers.

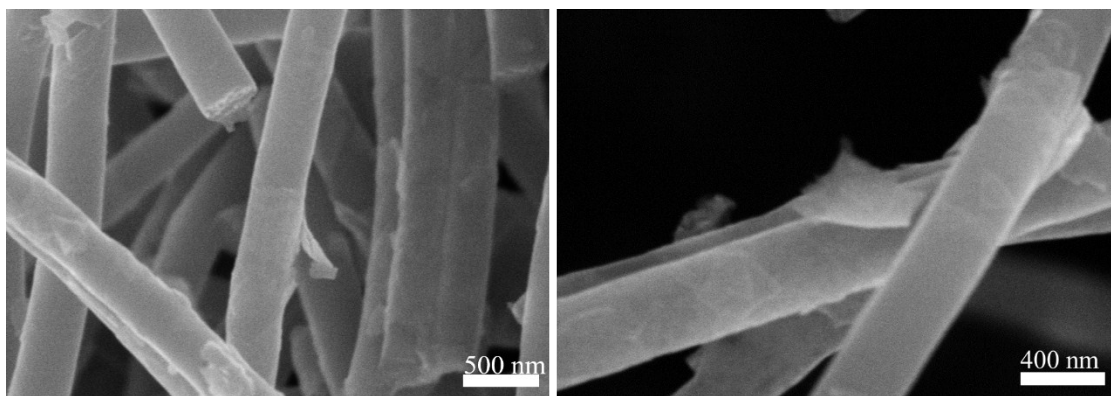

Figure S2: The SEM images of the MoSe<sub>2</sub>/C-600

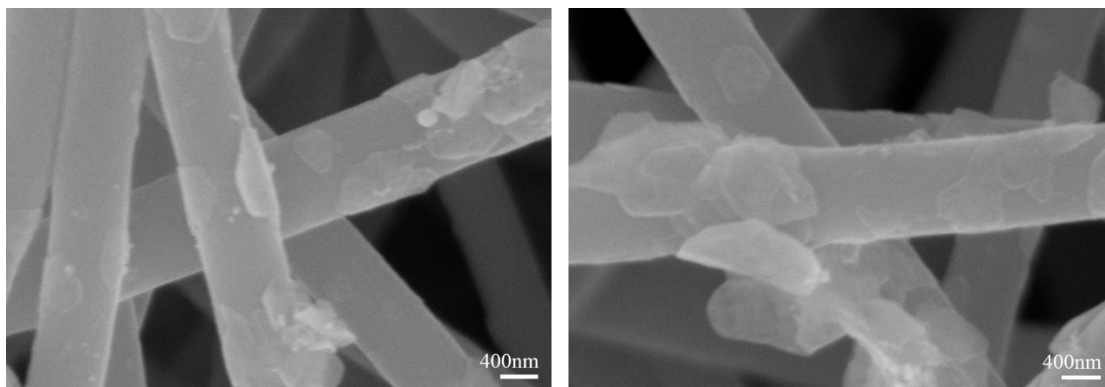

Figure S3: The SEM images of the MoSe<sub>2</sub>/C-800

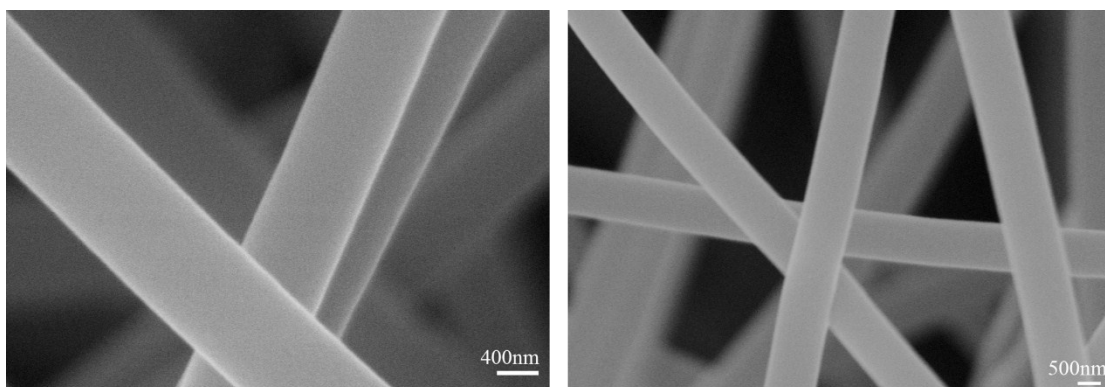

Figure S4: The SEM images of electrospinning Mo nanofibers.

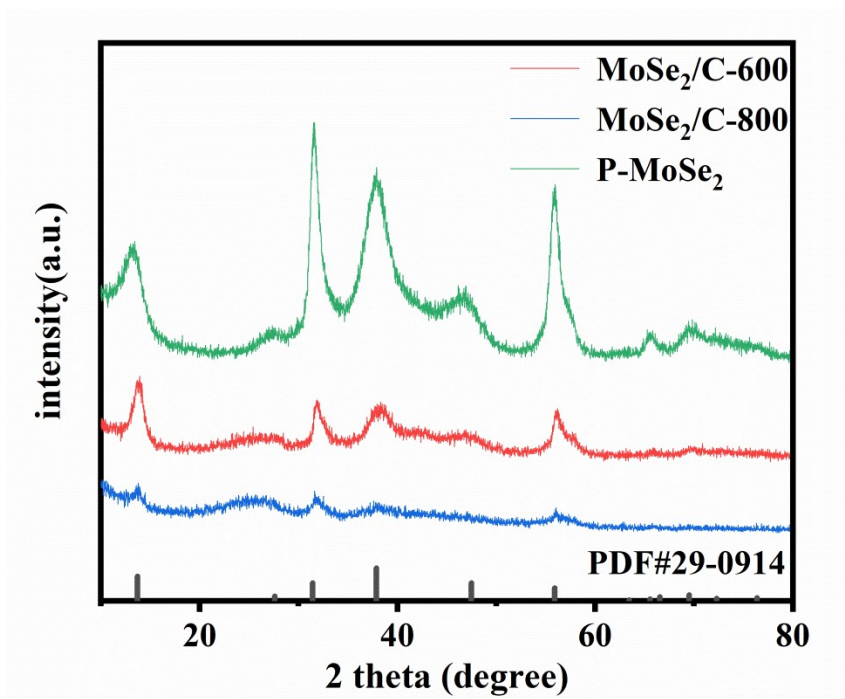

Figure S5: XRD patterns of MoSe<sub>2</sub>/C-600, MoSe<sub>2</sub>/C-800 and P-MoSe<sub>2</sub>.

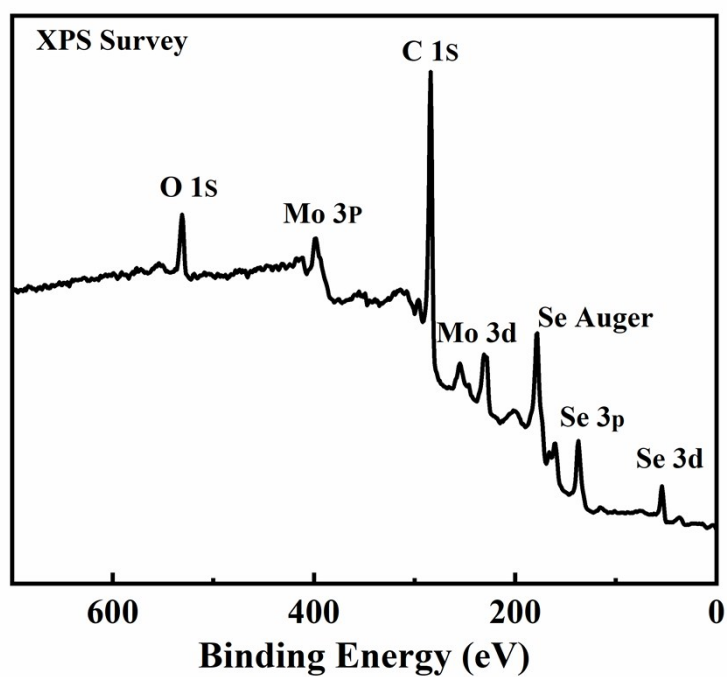

Figure S6: XPS survey spectrum of the MoSe<sub>2</sub>/C-700.

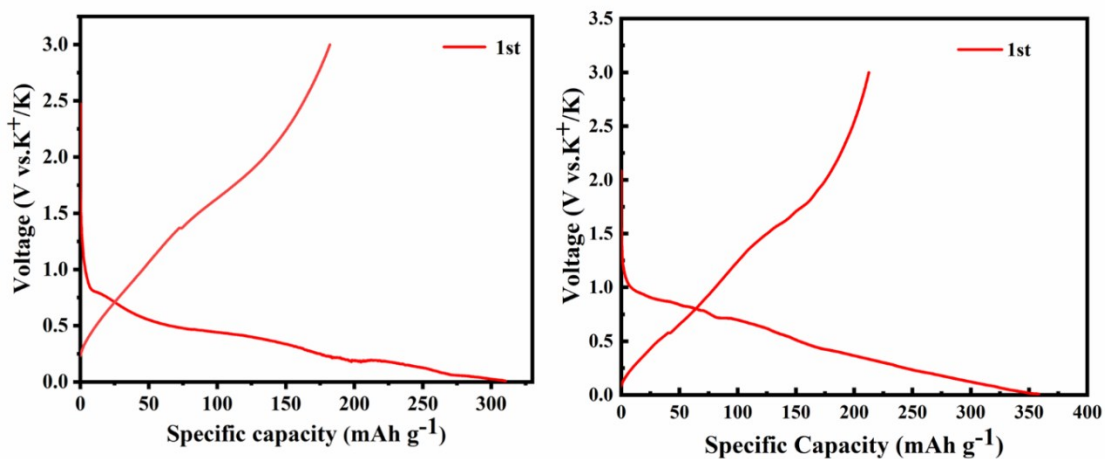

Figure S7: The initial charge/discharge profiles of MoSe<sub>2</sub>/C-600 and MoSe<sub>2</sub>/C-800.

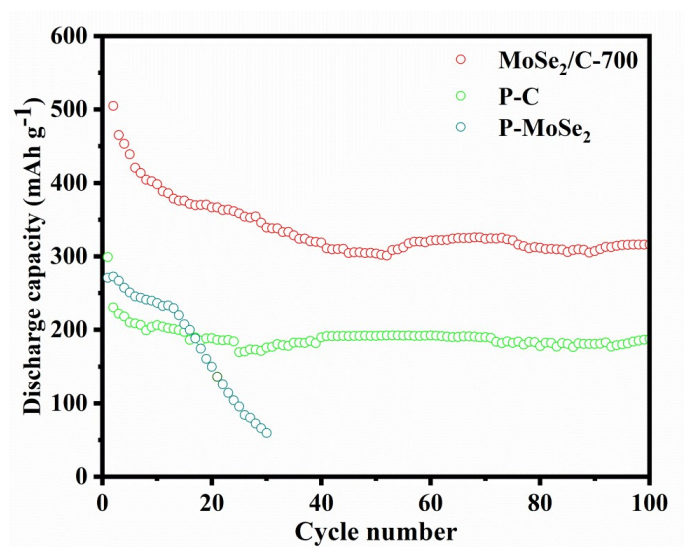

Figure S8: Cycling performance of MoSe<sub>2</sub>/C-700, P-C and P-MoSe<sub>2</sub>.

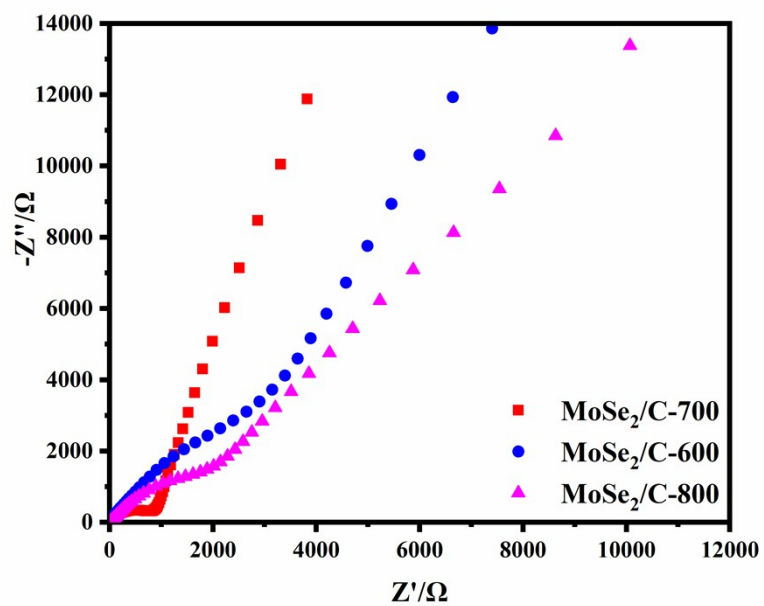

Figure S9: The EIS spectra and the equivalent circuit model of MoSe<sub>2</sub>/C-600, MoSe<sub>2</sub>/C-700 and MoSe<sub>2</sub>/C-800.

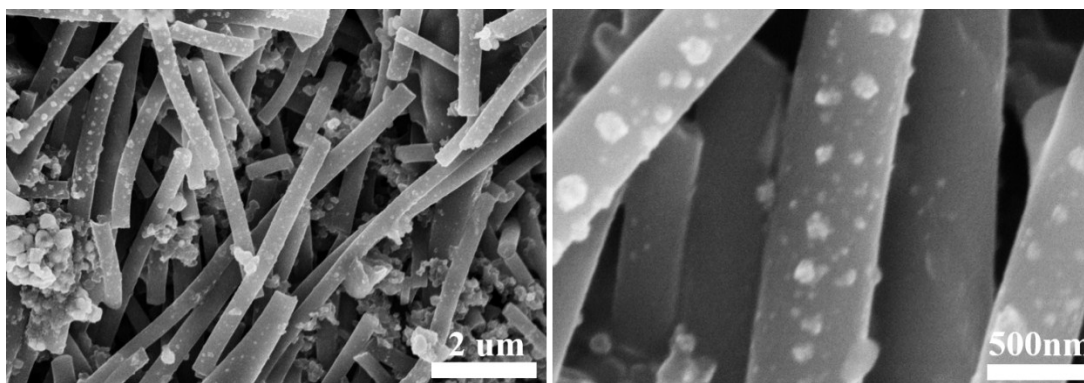

Figure S10: The images of the MoSe<sub>2</sub>/C-700 electrode after cycling for 100 cycles at 100 mA g<sup>-1</sup> in KIBs.

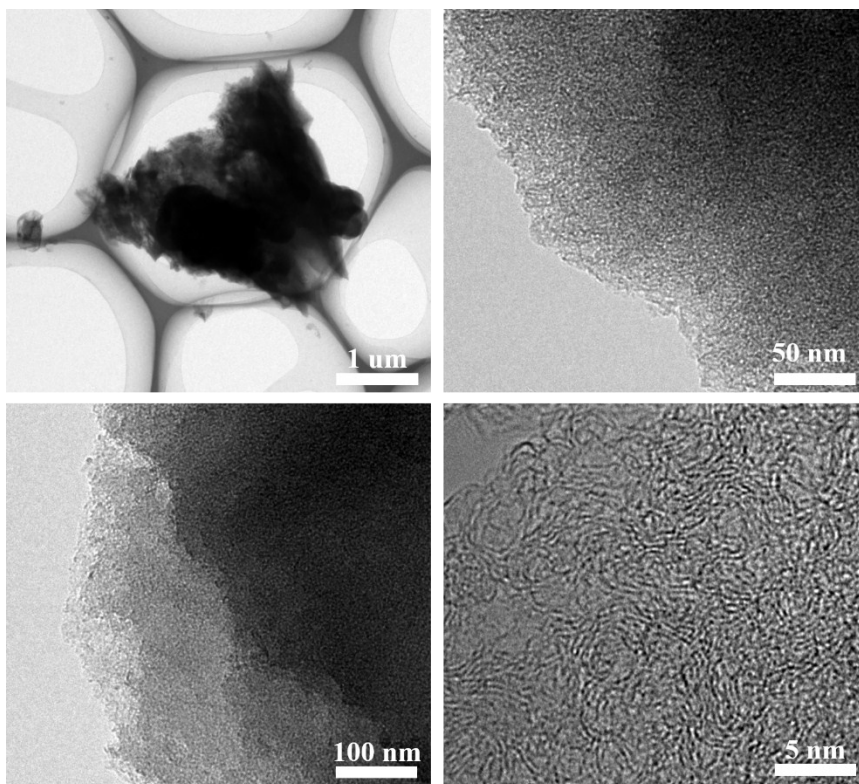

Figure S11: TEM and HRTEM images of Carbon Active.

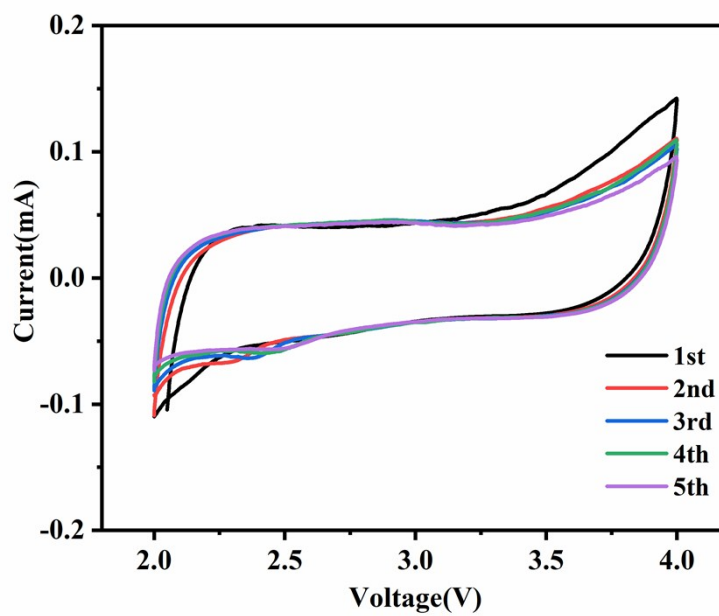

Figure S12: CV curve of active carbon in KIB measured at  $0.2 \text{ mV s}^{-1}$  in the voltage range of 2.0 - 4.0 V.

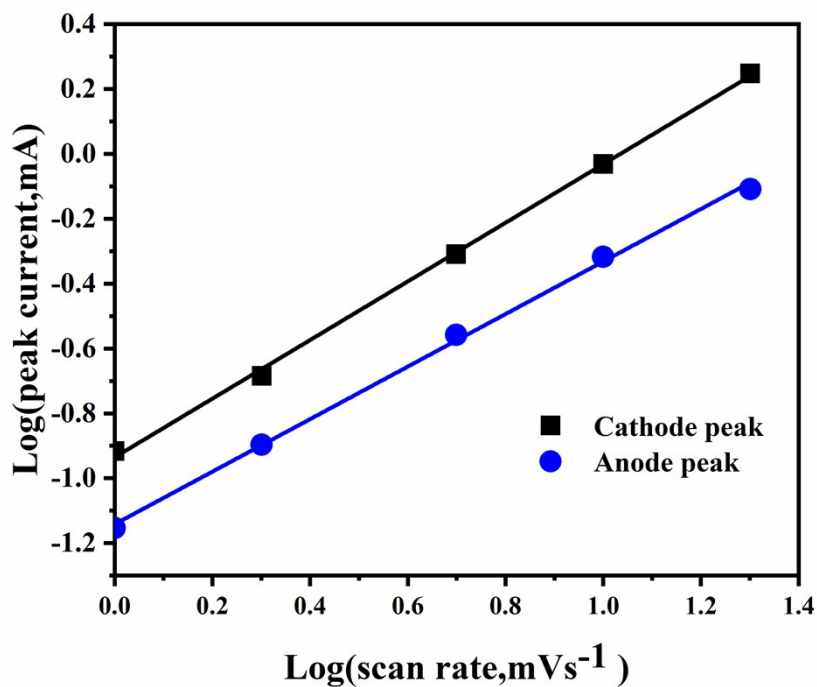

Figure S13: corresponding log  $i$  versus log  $v$  plots at each redox peak (peak current:  $i$ , scan rate:  $v$ ) of BSH.

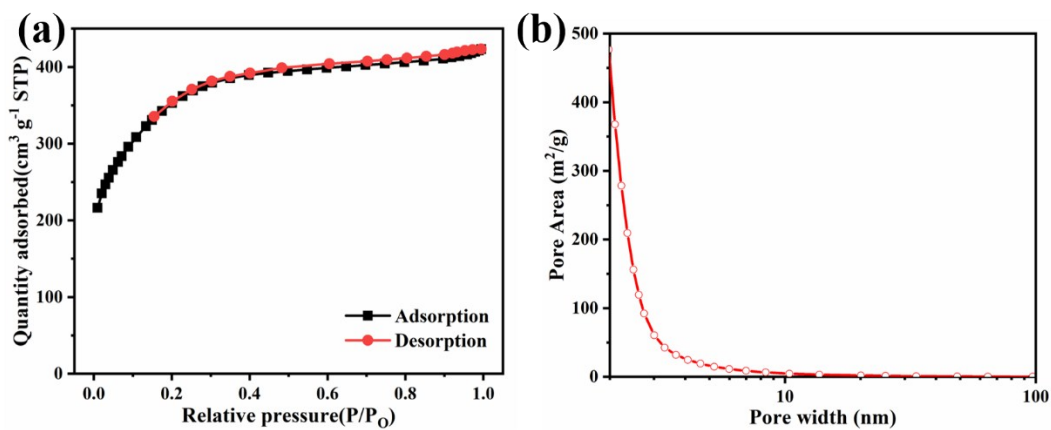

Figure S14: a): Nitrogen adsorption/desorption isotherm; b): pore-size distribution curves of powdery AC.



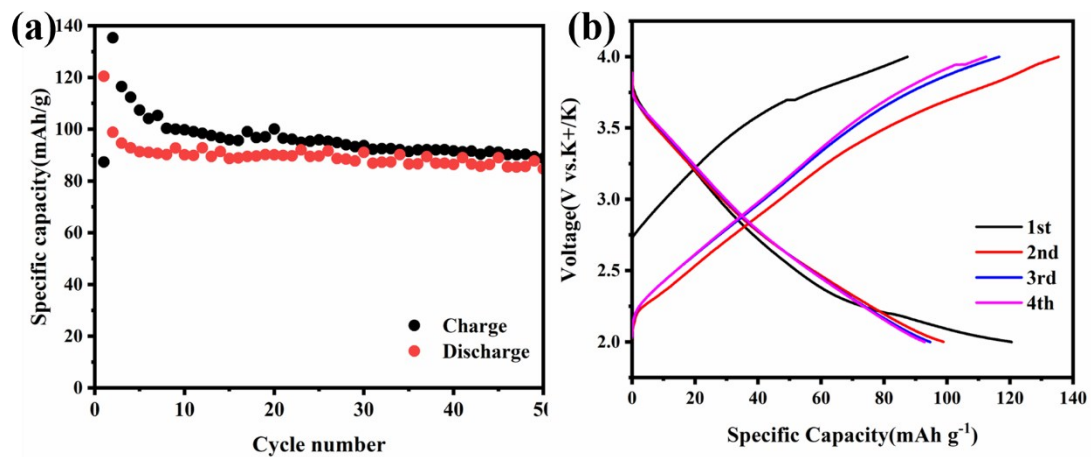

Figure S15: a): Cycling performance of AC at a current density 50 mA g<sup>-1</sup>; b) the first four GCD curves at the current density of 50 mA g<sup>-1</sup>.
